# Supplementary material for: Integrative and comparative genomic analyses identify clinically relevant pulmonary carcinoid groups and unveil the supra-carcinoids
Source: Nat Commun. 2019 Aug 20;10:3407. doi: 10.1038/s41467-019-11276-9 (PMC6702229; doi:10.1038/s41467-019-11276-9)
Supplement: Supplementary file 3 — Description of Additional Supplementary Files [file 41467_2019_11276_MOESM3_ESM.pdf]

## **Description of Additional Supplementary Files**

**File Name: Supplementary Data 1**

**Description:** Sample overview

**File Name: Supplementary Data 2**

**Description:** Principal Components based on RNA-seq data

**File Name: Supplementary Data 3**

**Description:** Principal Components based on methylation data

**File Name: Supplementary Data 4**

**Description:** Somatic mutations

**File Name: Supplementary Data 5**

**Description:** Hallmarks of cancer gene set enrichment analysis

**File Name: Supplementary Data 6**

**Description:** Gene set enrichment analysis for MOFA latent factors

**File Name: Supplementary Data 7**

**Description:** Chimeric transcripts

**File Name: Supplementary Data 8**

**Description:** Chromosomic rearrangements

**File Name: Supplementary Data 9**

**Description:** DLL3 and CD1A Immunohistochemistry

**File Name: Supplementary Data 10**

**Description:** Differentially expressed genes between MOFA LNET clusters

**File Name: Supplementary Data 11**

**Description:** Differentially methylated positions between MOFA LNET clusters.

**File Name: Supplementary Data 12**

**Description:** Differentially expressed genes between MOFA LNEN clusters

**File Name: Supplementary Data 13**

**Description:** Genes selected by the regularized GLM model based on the expression of core genes of LNET cluster B

**File Name: Supplementary Data 14**

**Description:** Summary statistics

**File Name: Supplementary Data 15**

**Description:** Differentially expressed genes between histological types

**File Name: Supplementary Data 16**

**Description:** Differentially methylated positions between histological types

**File Name: Supplementary Data 17**

**Description:** Differentially methylated positions between MOFA LNEN clusters

**File Name: Supplementary Data 18**

**Description:** Software summary

**File Name: Supplementary Software 1**

**Description:** R scripts used for data analysis
